# Supplementary material
Source: MDPI journal article supplement (https://www.mdpi.com/2297-8739/10/11/554)
Supplement: s1 [file s1]

# Supplementary Materials

## Purification, Characterization, and Ferrous Oxidation Kinetics of Iron Oxidase from *Acidithiobacillus ferridurans*

Yuandong Liu <sup>1,\*</sup>, Jiayu He <sup>1</sup>, Xiangdong Shangguan <sup>1</sup>, Run Liu <sup>1</sup>, Xiaofeng Zeng <sup>2,3</sup>, Wissal Belqadi <sup>1</sup>, Kan Wang <sup>1</sup>, Yan Tong <sup>1</sup>, Runlan Yu <sup>1</sup>, Weimin Zeng <sup>1</sup>, Xueling Wu <sup>1</sup>, Li Shen <sup>1</sup> and Guanzhou Qiu <sup>1</sup>

- <sup>1</sup> Key Laboratory of Biohydrometallurgy of Ministry of Education, School of Minerals Processing and Bioengineering, Central South University, Changsha 410083, China; jiaoyu3328@126.com (J.H.); xiangdongsg@sina.cn (X.S.); abcliurun@sina.com (R.L.); wissal.belqadi@edu.uiz.ac.ma (W.B.); dlwqw126@126.com (K.W.); yan\_\_tong@126.com (Y.T.); yrl715@sina.com (R.Y.); zengweimin1024@126.com (W.Z.); wxlcsu@csu.edu.cn (X.W.); lishen@csu.edu.cn (L.S.); gzhqiu@sina.cn (G.Q.)
- <sup>2</sup> Hengyang Kaixin Special Material Technology Co., Ltd., Hengyang 421200, China; zeng\_xf8@163.com
- <sup>3</sup> Faculty of Engineering, University Malaysia Sabah, Kota Kinabalu 88000, Sabah, Malaysia
- \* Correspondence: yuandong\_liu@csu.edu.cn; Tel.: +86-731-888-774-72

### Supplementary Text S1

**Text S1.** The regenerated and synthesized nucleotide gene sequence of the recombinant iron oxidase from *A. ferriidurans* Riv11. The coding sequence of proteins is black and regenerated by codon optimization according to the amino acid sequence using the GenSmart™ Codon Optimization tool (<https://www.genscript.com.cn/tools/gensmart-codon-optimization>). The translation stop codon is in purple. The ligase sequences of the *NdeI* restriction site at 5'-terminal and the *HindIII* restriction site at 3'-terminal are in blue.

>The synthesized nucleotide sequence of the recombinant iron oxidase from *A. ferriidurans* Riv11  
CATATGCATCACCACCACCACCATGGAACAGTATCTAAGGCGAGCGTCCAGTACCAGGATCATC  
CGCATGGTAAGCAAACTGCTCCGTGTGCGCGAACTTCGTGGCTCCGCACAGCTGCAAAGTTGT  
TGCCGGCACCATCGACCCGAATGGTTGGTGTGTTGCGTTTGCGCCAAAAAGCGCATAAAGCTT

# Supplementary Table S1

**Table S1.** Amino acid composition and property analysis of the recombinant iron oxidase from *A. ferridurans* Riv11. The hydrophobicity values of amino acid residue are from the Kyte and Doolittle hydrophobicity values [26].The net charge values at pH 2.0 of amino acid residues are computed according to the pKa values in the initial pKa values for standard amino acids [27]. The total counts for amino acid residue counts and their buried counts and exposed counts do not include N-Terminal, C-Terminal or the [Fe<sub>4</sub>S<sub>4</sub>] cluster.

| Amino acid residue                | Count     | Buried count | Exposed count | Hydrophobicity | Charge at pH 7.0 | Charge at pH2.0 | Total charges |
|-----------------------------------|-----------|--------------|---------------|----------------|------------------|-----------------|---------------|
| Ala (A)                           | 7         | 0            | 7             | 1.8            | 0                | 0               | 0             |
| Arg (R)                           | 0         | 0            | 0             | -4.5           | +1               | +1              | 0             |
| Asn (N)                           | 2         | 0            | 2             | -3.5           | 0                | 0               | 0             |
| Asp (D)                           | 2         | 0            | 2             | -3.5           | -1               | 0               | 0             |
| Cys (C)                           | 4         | 4            | 0             | 2.5            | -1               | -1              | -4            |
| Gln (Q)                           | 3         | 0            | 3             | -3.5           | 0                | 0               | 0             |
| Glu (E)                           | 0         | 0            | 0             | -3.5           | -1               | 0               | 0             |
| Gly (G)                           | 4         | 1            | 3             | -0.4           | 0                | 0               | 0             |
| His (H)                           | 10        | 0            | 10            | -3.2           | 0                | +1              | +10           |
| Ile (I)                           | 1         | 1            | 0             | 4.5            | 0                | 0               | 0             |
| Leu (L)                           | 0         | 0            | 0             | 3.8            | 0                | 0               | 0             |
| Lys (K)                           | 4         | 0            | 4             | -3.9           | +1               | +1              | +4            |
| Met (M)                           | 1         | 0            | 1             | 1.9            | 0                | 0               | 0             |
| Phe (F)                           | 2         | 0            | 2             | 2.8            | 0                | 0               | 0             |
| Pro (P)                           | 4         | 0            | 4             | -1.6           | 0                | 0               | 0             |
| Ser (S)                           | 5         | 0            | 5             | -0.8           | 0                | 0               | 0             |
| Thr (T)                           | 2         | 0            | 2             | -0.7           | 0                | 0               | 0             |
| Trp (W)                           | 1         | 0            | 1             | -0.9           | 0                | 0               | 0             |
| Tyr (Y)                           | 1         | 0            | 1             | -1.3           | 0                | 0               | 0             |
| Val (V)                           | 7         | 1            | 6             | 4.2            | 0                | 0               | 0             |
| N-Terminal                        | 1         | 0            | 1             |                | +1               | +1              | +1            |
| C-Terminal                        | 1         | 0            | 1             |                | -1               | 0               | 0             |
| [Fe <sub>4</sub> S <sub>4</sub> ] | 1         | 1            | 0             |                | +3               | +3              | +3            |
| <b>Total</b>                      | <b>60</b> | <b>7</b>     | <b>53</b>     |                |                  |                 | <b>+14</b>    |

## Supplementary Figure S1

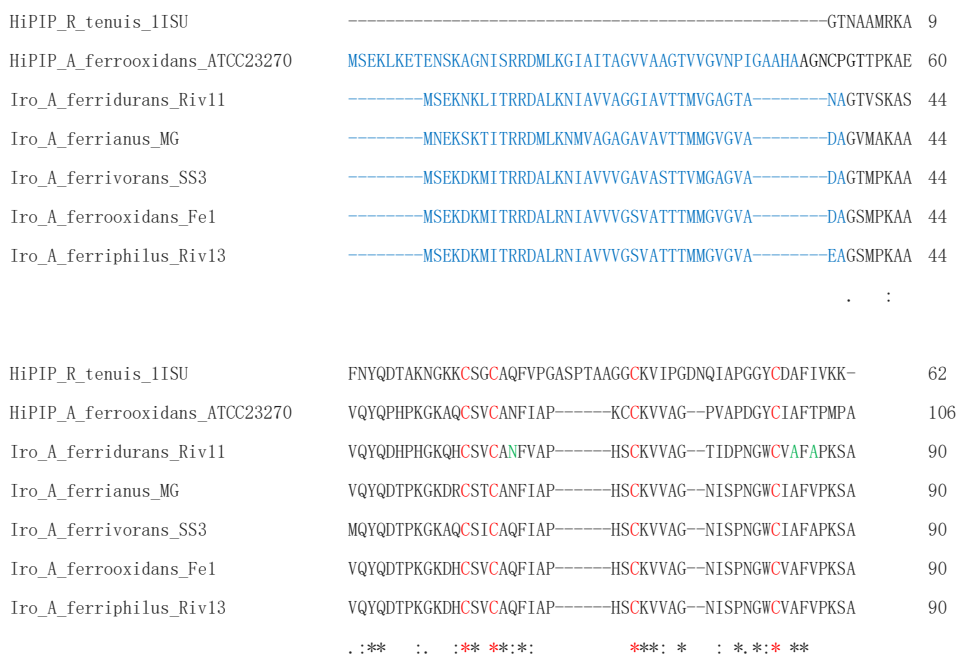

**Figure S1.** The multiple sequence alignment for the wild proteins of iron oxidase and HiPIP from various sources. HiPIP: high redox potential iron sulfur protein; Iro: iron oxidase. All the sequences can be obtained from NCBI Genebank (<https://www.ncbi.nlm.nih.gov/>) and their accession codes are as follows: Iro A. ferridurans Riv11:WP\_215878501;Iro A. ferrianus MG:WP\_239058863; Iro A. ferrivorans SS3:AEM47577;Iro A. ferrooxidans Fe1:CAA40594;Iro A. ferriphilus Riv13:WP\_215860796;HiPIP A. ferrooxidans ATCC23270:ACK79288;HiPIP R. tenuis(1ISU):P33678. The signal peptide sequece are in blue. Residues conserved in all sequences are marked with an \*. Residues not conserved in all sequences but conserved in some sequences are marked with (: or (.), based on the degree of conservation. The cysteine residues ligating the [Fe<sub>4</sub>S<sub>4</sub>] cluster are red. The key residues for interaction with ferrous ion are in blue.

## Supplementary Figure S2

|                                   |        |        |        |        |        |        |        |
|-----------------------------------|--------|--------|--------|--------|--------|--------|--------|
| 1: HiPIP_R_tenuis_1ISU            | 100.00 | 35.19  | 37.04  | 40.74  | 42.59  | 42.59  | 42.59  |
| 2: HiPIP_A_ferrooxidans_ATCC23270 | 35.19  | 100.00 | 54.44  | 55.56  | 56.67  | 53.33  | 53.33  |
| 3: Iro_A_ferridurans_Riv11        | 37.04  | 54.44  | 100.00 | 68.89  | 73.33  | 74.44  | 74.44  |
| 4: Iro_A_ferrianus_MG             | 40.74  | 55.56  | 68.89  | 100.00 | 77.78  | 80.00  | 78.89  |
| 5: Iro_A_ferrivorans_SS3          | 42.59  | 56.67  | 73.33  | 77.78  | 100.00 | 86.67  | 85.56  |
| 6: Iro_A_ferrooxidans_Fel         | 42.59  | 53.33  | 74.44  | 80.00  | 86.67  | 100.00 | 98.89  |
| 7: Iro_A_ferriphilus_Riv13        | 42.59  | 53.33  | 74.44  | 78.89  | 85.56  | 98.89  | 100.00 |

**Figure S2.** The percent identity matrix for the sequences of iron oxidase and HiPIP from various sources. The data were created by Clustal2.1 (<https://www.ebi.ac.uk/Tools/msa/clustalo/>) according to the multiple sequence alignment in Figure S1.

### Supplementary Figure S3

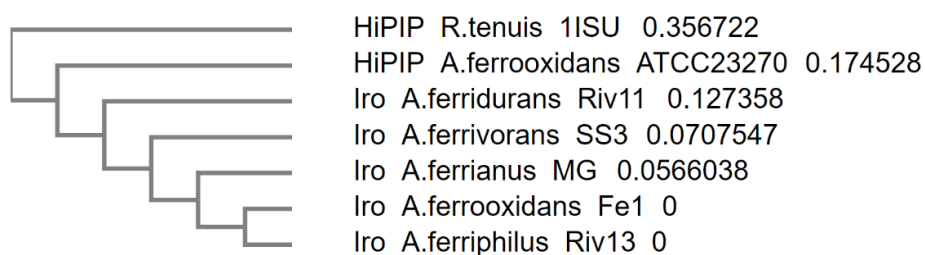

**Figure S3.** The phylogenetic tree for the sequences of iron oxidase and HiPIP from various sources. The data were created by Clustal2.1 (<https://www.ebi.ac.uk/Tools/msa/clustalo/>) according to the multiple sequence alignment in Figure S1 and the percent identity matrix in Figure S2.

### Supplementary Figure S4

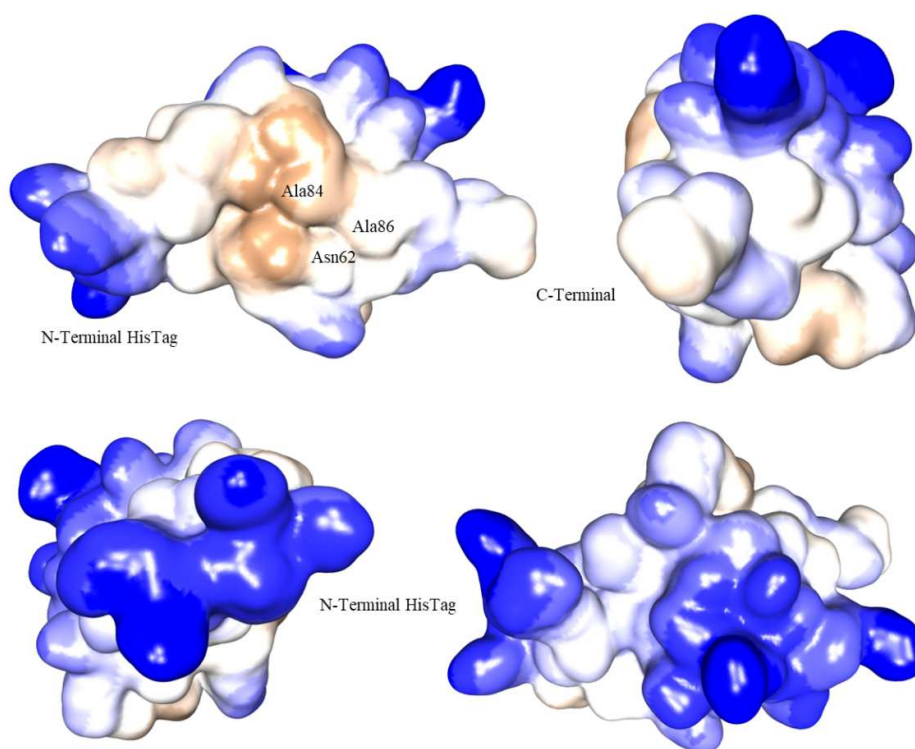

**Figure S4.** The hydrophobic surface analysis of iron oxidase from *A. ferridurans*. The hydrophobic property of the molecular surface was rendered according to the level, with a hydrophobicity spectrum ranging from the most hydrophobicity in brown to the most hydrophilicity in blue.

### Supplementary Figure S5

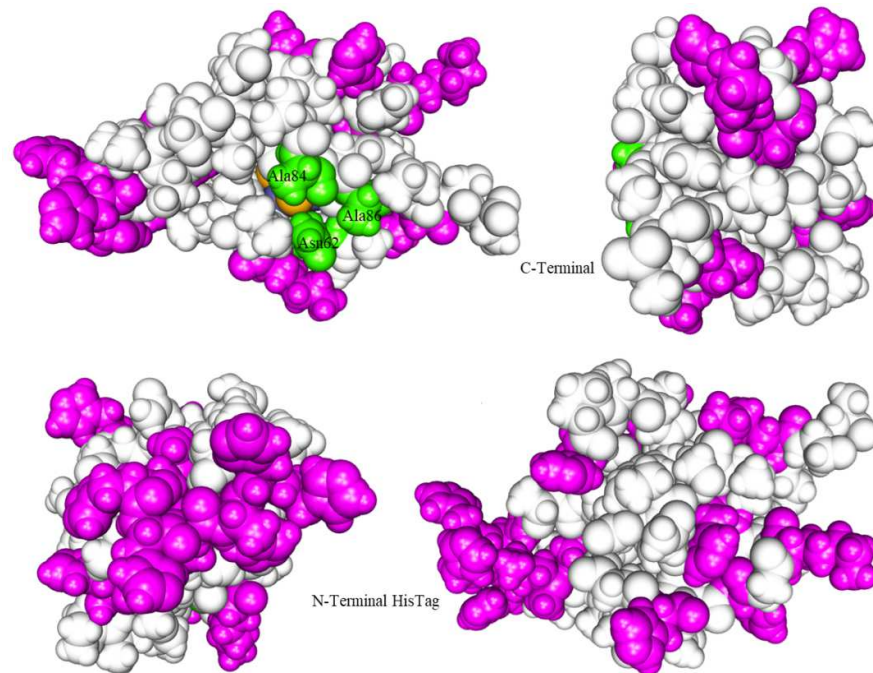

**Figure S5.** The surface charge analysis of recombinant iron oxidase from *A. ferriidurans*. The positively charged residues are in purple, the contact residues are in green and the other resdues in the protein are in white.
